# Supplementary material
Source: PubMed Central journal article supplement (PMC3502987)
Supplement: JCM.01237-12_zjm999092095so1.pdf [file JCM.01237-12_zjm999092095so1.pdf]

## Supplemental file

Y. Xu et al.: Culture-dependent and –independent investigations of microbial diversity on urinary catheters

Table 1. Details of patients and catheters.

| Catheter number | Catheter type     | Insertion time             | Suspicion of infection | Antibiotic treatment                      |
|-----------------|-------------------|----------------------------|------------------------|-------------------------------------------|
| 1               | Normal            | 22 days                    | No                     | Cefuroxim the first 3 days at hospital    |
| 2               | Normal            | 8 days                     | No                     | Ciprofloxacin, meropenem, caspofungin     |
| 3               | Normal            | Unknown                    | No                     | Ampicillin, caspofungin                   |
| 4               | Normal            | >20 days                   | No                     | Cefuroxim the first 3 days at hospital    |
| 5               | Normal            | 14 days                    | No                     | Cefuroxim the first 3 days at hospital    |
| 6               | Normal            | 21 days                    | No                     | Cefuroxim, ciprofloxacin                  |
| 7               | Normal            | Long time                  | Yes                    | Cefuroxim, metronidazol                   |
| 8               | Normal            | Long time (many catheters) | Yes                    | Meropenem, ciprofloxacin                  |
| 9               | Normal            | Long time                  | No                     | Meropenem, ciprofloxacin, linezolid       |
| 10              | Normal            | 13 days                    | Yes                    | Ciprofloxacin                             |
| 11              | Normal            | >7 days                    | Yes                    | Cefuroxim, metronidazol                   |
| 12              | Top               | 27 days                    | No                     | No                                        |
| 13              | Normal            | 3 days                     | No                     | Cefuroxim                                 |
| 14              | Normal            | 19 days                    | No                     | Cefuroxim in the first 5 days at hospital |
| 15-24           | No data available |                            |                        |                                           |
